# Supplementary material for: Melatonin promotes neuroblastoma cell differentiation by activating hyaluronan synthase 3‐induced mitophagy
Source: PubMed Central journal article supplement (PMC6712479; doi:10.1002/cam4.2389), 2019-07-05

Figure S2 (revised)

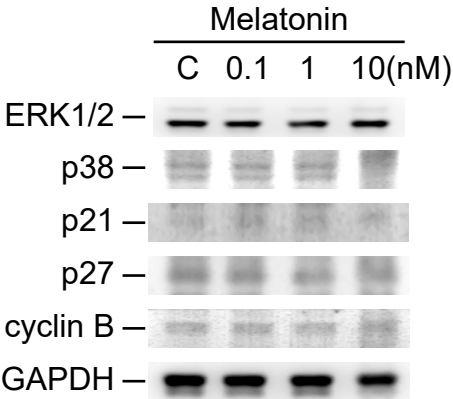

Supplement: CAM4-8-4821-s002.pdf [file CAM4-8-4821-s002.pdf]
